# Supplementary material for: Harnessing the Potential of Enzymes as Inhaled Therapeutics in Respiratory Tract Diseases: A Review of the Literature
Source: MDPI journal article supplement (doi:10.3390/biomedicines10061440), 2022-06-17
Supplement: s1 [file s1]

## Supplementary Material

**Table S1.** Search strings used in the search for literature using PubMed and the search for clinical trials using ClinicalTrials.gov.

| Database           | Search terms                                                                                                                                                                                                                                                                                                                                                                                                                            |
|--------------------|-----------------------------------------------------------------------------------------------------------------------------------------------------------------------------------------------------------------------------------------------------------------------------------------------------------------------------------------------------------------------------------------------------------------------------------------|
| PubMed             | (enzyme therap*) OR (inhaled therap*) OR (inhalation therap*) OR (enzyme drug) OR (botanical enzyme) OR (botanical drug) OR (herbal extract*) OR (plant-derived enzyme) OR (plant-derived drug) or (plant derived extract) OR (enzybiotics)                                                                                                                                                                                             |
|                    | Filters: publications in humans, and in the English language.                                                                                                                                                                                                                                                                                                                                                                           |
|                    | (respiratory infection) OR (infection) OR (respiratory tract infection OR RTI) OR (viral infection) OR (microbial infection) OR (respiratory disease)<br><br>Filters: publications in humans, and in the English language.                                                                                                                                                                                                              |
| ClinicalTrials.gov | <p><b>Condition or disease:</b> (respiratory infection) OR (respiratory disease) OR (COVID-19 OR SARS-CoV-2) OR (respiratory syndrome) OR RTI</p> <p><b>Other terms:</b> (enzyme therapeutic) OR (enzyme therapy) OR (plant enzyme)</p> <p>Filter: Terminated recruitment status</p> <p><i>Subsequent searches used Google to determine other pipeline drugs in development in RTIs and COVID-19 and the use of enzymes in RTI.</i></p> |

COVID, coronavirus disease; RTI, respiratory tract infection.
